# Supplementary material for: The role of hedgerows in shaping ant (Formicidae) communities in agricultural ecosystems: for a better understanding of agroecosystems functioning, including presumed ecosystem services and disservices
Source: Copernicus journal article supplement (doi:10.5194/we-26-1-2026), 2026-01-08
Supplement: Supplementary file 1 [file we-2025-9-supplement.xlsx]

## Sheet: Table S1
Table S1: Communities (sums of species incidences) considered in the study as a function of the community code and their characteristics (Hedgerow code, Distance (m), Hedgerow type). Species codes (e.g. Asub) are abbreviations using the first letter of the genus name, followed by the first three letters of the species name.
Code	Hedgerow_code	Distance	Hedgerow_type	Asub	Ctru	Fcun	Fruf	Lbru	Lema	Lfla	Lful	Lnig	Lpla	Mgra	Mrug	Msab	Msca	Mspe	Mspi	Sfug	Tcae	Terr	Tmor	Tnyl
1_0	1	0	Shrubby	0	0	3	2	0	0	0	0	1	0	0	0	0	0	0	0	0	2	0	0	0
1_6	1	6	Shrubby	0	0	1	2	0	0	0	0	2	0	0	0	0	0	0	0	1	3	0	1	0
1_12	1	12	Shrubby	0	0	2	3	0	0	0	0	1	0	0	0	0	0	1	1	1	2	0	1	0
1_24	1	24	Shrubby	0	0	1	2	0	0	0	0	0	0	0	0	0	1	0	0	0	3	0	0	0
1_48	1	48	Shrubby	0	0	0	3	0	0	0	0	0	1	0	0	0	2	1	1	1	1	0	2	0
2_0	2	0	Arboreal	0	0	3	3	0	2	0	0	0	0	0	0	0	2	1	1	0	0	0	0	1
2_6	2	6	Arboreal	0	0	2	2	1	1	0	0	1	0	0	0	0	0	0	2	0	1	0	0	0
2_12	2	12	Arboreal	0	0	3	3	0	0	0	0	1	1	0	0	0	0	1	1	0	3	0	1	0
2_24	2	24	Arboreal	0	0	1	2	0	0	0	0	1	0	0	0	0	0	0	0	0	2	0	0	0
2_48	2	48	Arboreal	0	0	0	2	0	0	0	0	2	0	0	0	0	0	0	0	0	2	0	0	0
3_0	3	0	Shrubby	0	0	2	0	0	0	1	0	1	0	1	0	0	0	0	1	1	0	0	0	0
3_6	3	6	Shrubby	0	0	1	1	0	0	0	0	2	2	0	0	0	0	0	0	1	1	0	1	0
3_12	3	12	Shrubby	0	0	3	2	0	0	0	0	2	2	0	0	0	1	0	0	1	0	0	0	0
3_24	3	24	Shrubby	0	0	3	3	0	0	0	0	0	1	0	0	0	0	0	0	0	2	0	2	0
3_48	3	48	Shrubby	0	0	1	3	0	0	0	0	1	1	0	0	0	0	0	0	1	2	0	1	0
4_0	4	0	Shrubby	0	0	2	1	0	0	0	0	0	1	0	0	2	1	0	0	0	2	0	0	0
4_6	4	6	Shrubby	0	0	2	2	0	0	0	0	0	0	0	0	1	1	0	0	0	2	0	0	0
4_12	4	12	Shrubby	0	0	1	3	0	0	0	0	0	0	0	0	1	0	0	0	0	3	0	0	0
4_24	4	24	Shrubby	0	0	1	3	0	0	0	0	0	0	0	0	1	0	1	0	0	2	0	0	0
4_48	4	48	Shrubby	0	0	0	2	0	0	0	0	0	1	0	0	0	0	0	0	0	1	0	0	0
5_0	5	0	Shrubby	0	0	2	0	0	0	1	0	0	0	0	0	1	1	1	0	0	1	0	0	0
5_6	5	6	Shrubby	0	0	3	0	0	0	0	0	1	2	0	0	0	0	2	0	2	3	0	0	0
5_12	5	12	Shrubby	0	0	2	0	0	0	0	0	2	0	0	0	0	0	1	0	1	2	0	0	0
5_24	5	24	Shrubby	0	0	3	1	0	0	0	0	3	1	0	0	0	0	0	0	1	1	0	0	0
5_48	5	48	Shrubby	0	0	1	1	0	0	0	0	1	1	0	0	0	0	0	0	0	0	0	0	0
6_0	6	0	Arboreal	0	0	2	1	0	0	0	0	0	0	0	0	2	2	0	0	0	1	0	0	0
6_6	6	6	Arboreal	0	0	2	0	0	0	1	0	0	0	0	0	1	2	2	0	1	3	0	0	0
6_12	6	12	Arboreal	0	0	1	2	0	0	0	0	1	2	0	0	0	2	2	0	0	0	0	0	0
6_24	6	24	Arboreal	0	0	3	2	0	0	0	0	3	2	0	0	0	2	1	0	2	1	0	0	0
6_48	6	48	Arboreal	0	0	3	2	0	0	0	0	3	2	0	0	1	0	0	0	1	1	0	0	0
7_0	7	0	Shrubby	0	0	0	1	0	0	0	0	0	0	1	0	1	0	0	0	0	0	0	0	0
7_6	7	6	Shrubby	0	0	0	0	0	0	0	0	0	0	0	0	0	0	0	0	0	0	0	0	0
7_12	7	12	Shrubby	0	0	0	3	0	0	0	0	0	0	0	0	1	0	0	0	0	3	0	0	0
7_24	7	24	Shrubby	0	0	0	2	0	0	0	0	1	0	0	0	0	0	0	0	0	3	0	0	0
7_48	7	48	Shrubby	0	0	0	0	0	0	0	0	0	0	0	0	0	0	1	0	0	3	0	0	0
8_6	8	6	Shrubby	0	0	0	0	0	0	0	0	0	0	0	0	0	0	0	0	0	1	1	0	0
8_12	8	12	Shrubby	0	0	0	0	0	0	0	0	0	0	0	0	0	0	0	0	0	0	0	0	0
8_24	8	24	Shrubby	0	0	0	0	0	0	0	0	0	0	0	0	0	0	0	0	0	0	0	0	0
8_48	8	48	Shrubby	0	0	0	0	0	0	0	0	0	0	0	0	0	0	0	0	0	1	0	0	0
9_0	9	0	Arboreal	0	1	0	0	0	0	0	0	0	0	1	2	0	1	0	0	0	1	0	0	2
9_6	9	6	Arboreal	0	0	0	0	0	0	0	0	0	0	0	0	0	0	0	0	0	0	0	0	0
9_12	9	12	Arboreal	0	0	0	0	0	0	0	0	0	0	0	0	0	0	0	0	0	0	0	0	0
9_24	9	24	Arboreal	0	0	0	0	0	0	0	0	0	0	0	0	0	0	0	0	0	1	0	0	0
9_48	9	48	Arboreal	0	0	0	0	0	0	0	0	0	0	0	0	0	0	0	0	0	2	0	0	0
10_0	10	0	Arboreal	0	0	2	1	0	0	0	0	0	0	1	0	0	0	0	0	0	0	0	0	0
10_6	10	6	Arboreal	0	0	0	0	0	0	0	0	0	0	0	0	0	0	0	0	0	2	0	0	0
10_12	10	12	Arboreal	0	0	0	1	0	0	0	0	0	0	0	0	0	0	0	0	0	2	0	0	0
10_24	10	24	Arboreal	0	0	0	0	0	0	0	0	0	0	0	0	0	0	0	0	0	1	0	0	0
11_0	11	0	Arboreal	0	0	0	0	0	0	0	0	0	0	0	0	1	0	1	0	0	0	0	0	0
11_12	11	12	Arboreal	0	0	0	0	0	0	0	0	0	1	0	1	1	1	1	0	0	2	0	0	0
11_24	11	24	Arboreal	0	0	0	0	0	0	0	0	0	0	0	0	0	1	0	0	0	1	0	0	0
11_48	11	48	Arboreal	0	0	0	0	0	0	0	0	0	0	0	0	1	0	0	0	0	2	0	0	0
12_0	12	0	Arboreal	0	0	0	1	0	0	0	0	0	0	0	0	1	1	0	0	0	0	0	0	0
12_12	12	12	Arboreal	0	0	0	1	0	0	0	0	0	0	0	0	0	0	0	0	0	2	0	0	0
12_24	12	24	Arboreal	0	0	0	0	0	0	0	0	1	1	0	0	0	2	0	0	0	3	0	0	0
12_48	12	48	Arboreal	0	0	0	0	0	0	0	0	1	1	0	0	1	2	1	0	0	1	0	0	0
13_0	13	0	Arboreal	0	0	1	0	0	0	0	0	0	0	0	0	2	2	0	0	0	0	0	0	0
13_6	13	6	Arboreal	0	0	1	0	0	0	0	0	1	0	0	0	2	1	0	0	0	0	0	0	0
13_12	13	12	Arboreal	0	0	1	0	0	0	0	0	1	1	0	0	2	1	0	0	0	0	0	0	0
13_24	13	24	Arboreal	0	0	0	0	0	0	0	0	1	2	0	0	3	0	0	0	0	2	0	0	0
13_48	13	48	Arboreal	0	0	0	0	0	0	0	0	0	0	0	0	0	0	0	0	0	2	0	1	0
14_0	14	0	Arboreal	0	0	2	0	0	0	0	0	0	0	0	0	2	1	0	0	0	2	0	0	1
14_6	14	6	Arboreal	0	0	1	0	0	0	0	0	0	1	0	0	0	1	0	0	0	2	0	0	0
14_12	14	12	Arboreal	0	0	2	0	0	0	0	0	0	0	0	0	2	0	0	0	0	2	0	0	0
14_24	14	24	Arboreal	0	0	0	0	0	0	0	0	1	1	0	0	0	0	0	0	0	3	0	0	0
14_48	14	48	Arboreal	0	0	0	0	0	0	0	0	1	1	0	0	0	0	0	0	0	3	0	0	0
15_0	15	0	Arboreal	0	0	0	0	0	0	0	0	0	0	0	0	1	0	0	0	0	1	0	0	0
15_6	15	6	Arboreal	0	0	0	0	0	0	0	0	0	1	0	0	0	0	0	0	0	2	0	0	0
15_12	15	12	Arboreal	0	0	0	0	0	0	0	0	0	0	0	0	0	0	0	0	0	2	0	0	0
15_24	15	24	Arboreal	0	0	0	0	0	0	0	0	0	0	0	0	0	0	0	0	0	0	0	0	0
15_48	15	48	Arboreal	0	0	0	0	0	0	0	0	0	0	0	0	0	0	0	0	0	0	0	0	0
17_0	17	0	Shrubby	1	0	1	0	0	0	0	0	1	1	0	0	1	2	1	0	0	1	0	0	0
17_6	17	6	Shrubby	0	0	1	0	0	0	0	0	1	0	0	0	1	1	1	0	0	1	0	0	0
17_12	17	12	Shrubby	0	0	3	0	0	0	2	0	1	1	0	0	2	0	2	0	0	2	0	0	0
17_24	17	24	Shrubby	0	0	2	0	0	0	0	0	3	3	0	0	2	1	2	0	0	2	0	0	0
17_48	17	48	Shrubby	0	0	2	0	0	0	0	0	3	2	0	0	3	2	3	0	1	2	0	0	0
18_0	18	0	Arboreal	2	0	1	0	0	0	0	1	0	0	0	0	0	0	0	0	0	0	0	0	1
18_6	18	6	Arboreal	0	0	1	1	0	0	0	0	0	1	0	0	0	1	1	0	0	0	0	0	0
18_12	18	12	Arboreal	0	0	1	0	0	0	0	0	0	0	0	0	0	0	0	0	0	1	0	0	0
18_24	18	24	Arboreal	0	0	0	0	0	0	0	0	0	0	0	0	0	0	0	0	0	0	0	0	0
18_48	18	48	Arboreal	0	0	0	0	0	0	0	0	0	0	0	0	0	0	0	0	0	0	0	0	0
19_0	19	0	Shrubby	0	0	1	0	0	0	0	0	0	0	1	0	1	0	0	0	0	0	0	0	0
19_6	19	6	Shrubby	0	0	0	0	0	0	0	0	0	0	0	0	1	1	0	0	0	1	0	0	0
19_12	19	12	Shrubby	0	0	0	0	0	0	0	0	0	0	0	0	0	2	0	0	0	1	0	0	0
19_24	19	24	Shrubby	0	0	1	0	0	0	0	0	0	0	0	0	0	0	0	0	0	1	1	0	0
19_48	19	48	Shrubby	0	0	0	0	0	0	0	0	0	0	0	0	0	0	0	0	0	2	0	0	0
20_0	20	0	Arboreal	0	0	2	0	0	0	0	0	0	0	1	0	2	0	0	0	0	1	0	0	0
20_6	20	6	Arboreal	0	0	0	0	0	0	0	0	0	0	0	0	1	1	0	0	0	1	0	0	0
20_12	20	12	Arboreal	0	0	0	0	0	0	0	0	0	0	0	0	1	0	0	0	0	2	0	0	0
20_24	20	24	Arboreal	0	0	2	1	0	0	0	0	1	1	0	0	0	2	1	0	0	3	0	0	0
20_48	20	48	Arboreal	0	0	0	0	0	0	0	0	0	0	0	0	0	0	0	0	0	3	0	0	0

## Sheet: Table S2
Table S2: Values of functional traits and ecosystem (dis)services measures for each species. Species codes (e.g. Asub) are abbreviations using the first letter of the genus name, followed by the first three letters of the species name.
Species	Worker size	Worker Polymorphism	Diurnality	Behavioral Dominance	Seed eating	Insect eating	Liquid-food eating	Individual foraging strategy	Group foraging strategy	Collective foraging strategy	Colony size	Number of queens	Number of nests	Colony foundation type	Seed dispersion	Insect predation	Aphid breeding/Nectar thief	Soil tilling
Asub	3.8	0.45	0	0	0.5	0.5	0	0	1	0	7.6	0	0	1	57.76	14.44	0	0
Ctru	4.5	0.67	0	0	0	0	1	1	0	0	5.7	0	1	1	0	0	25.65	0
Fcun	5.3	0.47	1	0	0	0.5	0.5	0	1	0	7.24	0	0.5	1	115.116	19.186	19.186	38.372
Fruf	6	0.5	1	0	0	0.5	0.5	0	1	0	6.91	0	0	1	124.38	20.73	20.73	41.46
Lbru	2.9	0.62	0	0	0	0.25	0.75	0	0	1	9.21	0	0	1	53.418	6.67725	20.0317	0
Lema	3.2	0.47	0	1	0	0.25	0.75	0	0	1	9.21	0	0	1	58.944	7.368	22.104	0
Lfla	2.9	0.79	0	0	0	0.25	0.75	0	0	1	9.21	0.5	0	1	53.418	6.67725	20.0317	26.709
Lful	4	0.5	0	1	0	0.25	0.75	0	0	1	14.73	0	0	0	117.84	14.73	44.19	0
Lnig	3	0.67	0	1	0	0.25	0.75	0	0	1	9.21	0	0	1	55.26	6.9075	20.7225	27.63
Lpla	3	0.67	0	1	0	0.25	0.75	0	0	1	9.21	0	0	1	55.26	6.9075	20.7225	0
Mgra	3.05	0.36	0	0	0	0.75	0.25	1	0	0	4.61	0.5	0	0	0	10.5454	3.51512	14.0605
Mrug	4.75	0.11	0	0	0	0.5	0.5	0	0	1	7.6	0.5	0	0.5	72.2	18.05	18.05	36.1
Msab	4.4	0.14	0	0	0	0.5	0.5	0	0	1	8.01	1	0	0.5	70.488	17.622	17.622	35.244
Mspi	4.4	0.14	0	0	0	0.5	0.5	0	0	1	8.01	1	0	0.5	70.488	17.622	17.622	35.244
Msca	4.25	0.24	0	0	0	0.5	0.5	0	0	1	7.31	0.5	0	0.5	62.135	15.5337	15.5337	31.0675
Mspe	5.6	0.18	0	0	0	0.5	0.5	0	0	1	7.3	1	0	0.5	81.76	20.44	20.44	40.88
Sfug	2	0.38	0	0	0	0.75	0.25	0	0	1	11	1	0	1	22	16.5	5.5	22
Terr	2.8	0.54	0	1	0	0	1	0	0	1	8.16	1	1	0	45.696	0	22.848	22.848
Tnyl	2.65	0.3	0	0	0	0.5	0.5	0	1	0	5.7	0	0	1	30.21	7.5525	7.5525	0
Tcae	2.9	0.41	0	1	0.25	0.75	0	0	0	1	9.21	0	0	1	26.709	20.0317	0	26.709
Tmor	3.1	0.41	0	1	0.25	0.75	0	0	0	1	9.21	0.5	0	1	28.551	21.4133	0	28.551
