# Supplementary material for: The role of hedgerows in shaping ant (Formicidae) communities in agricultural ecosystems: for a better understanding of agroecosystems functioning, including presumed ecosystem services and disservices
Source: Copernicus journal article supplement (doi:10.5194/we-26-1-2026), 2026-01-08
Supplement: Supplementary file [file we-26-1-2026-supplement-title-page.pdf › we-26-1-2026-supplement-title-page.pdf]

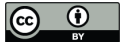

## *Supplement of*

# **The role of hedgerows in shaping ant (Formicidae) communities in agricultural ecosystems: for a better understanding of agroecosystems functioning, including presumed ecosystem services and disservices**

**Cyril Marty et al.**

*Correspondence to:* Cyril Marty ([martycyril85@gmail.com](mailto:martycyril85@gmail.com))

- [we-26-1-2026-supplement-title-page.pdf](#)
- [we-2025-9-supplement.xlsx](#)

The copyright of individual parts of the supplement might differ from the article licence.
